# Supplementary material for: Identification of phosphatases that dephosphorylate the co-chaperone BAG3
Source: PubMed Central journal article supplement (PMC11576475; doi:10.26508/lsa.202402734), 2024-11-19

# Figure 2 A

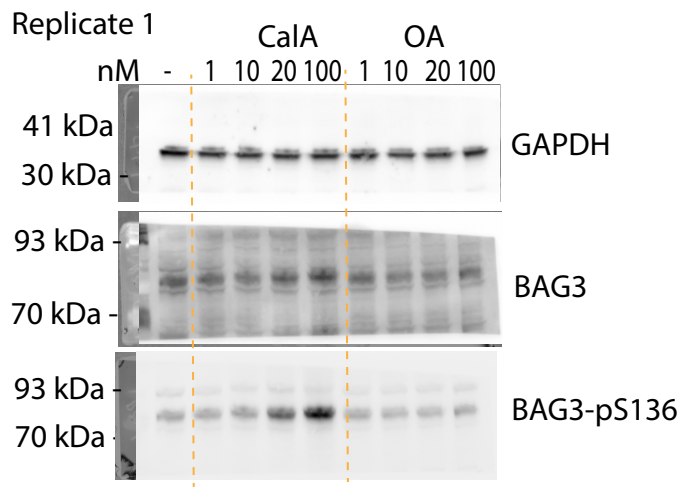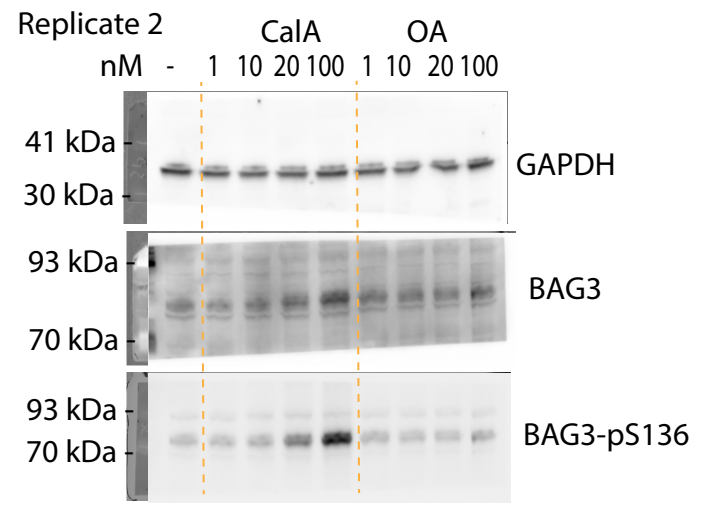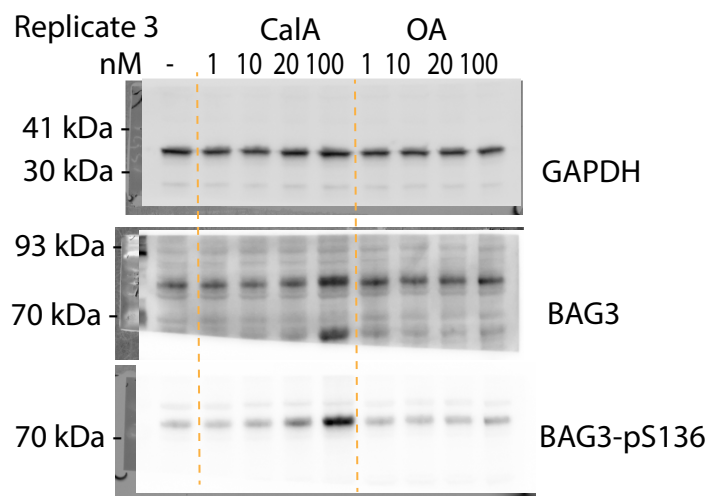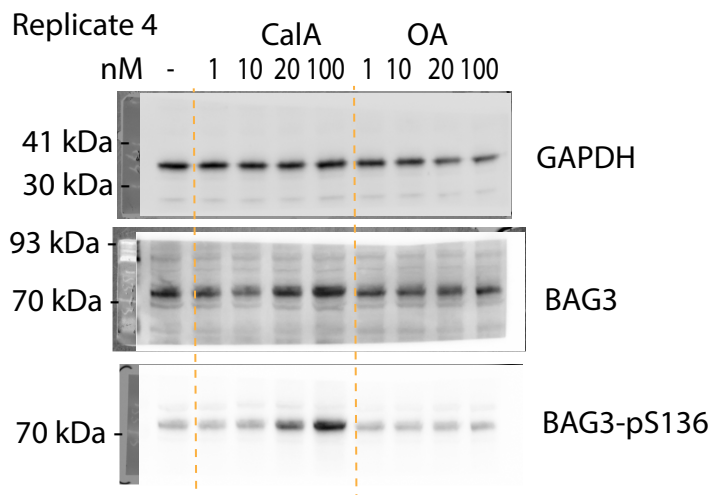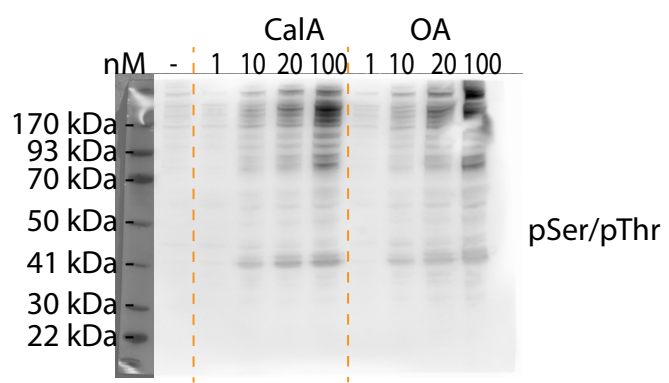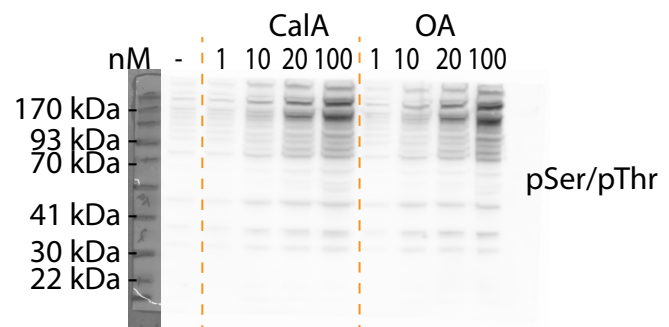

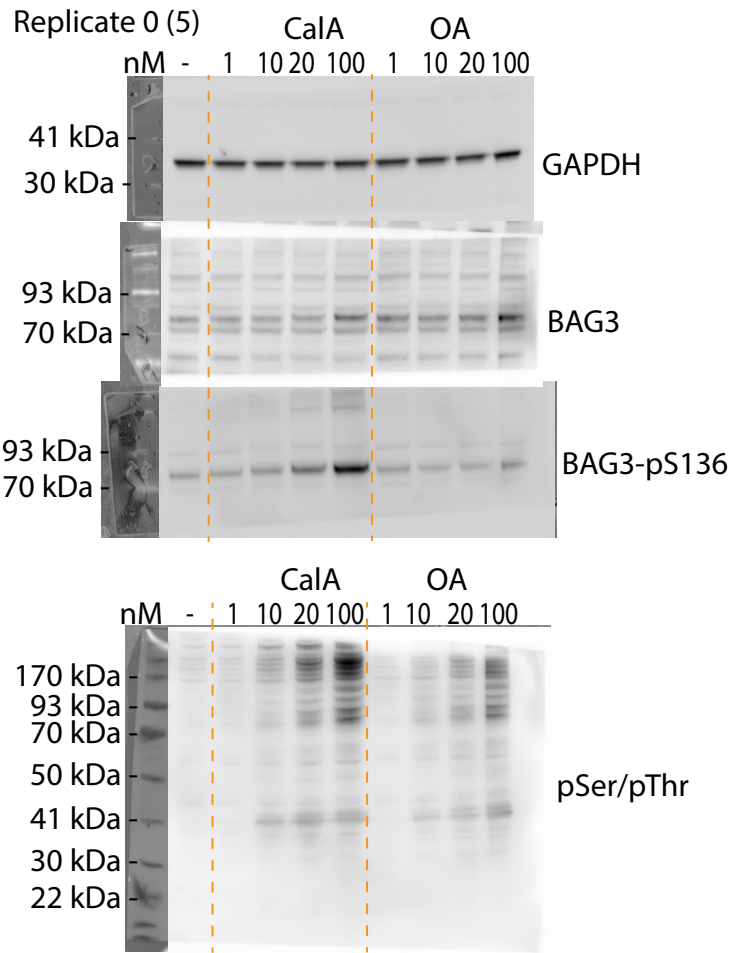

**Figure 2 D**

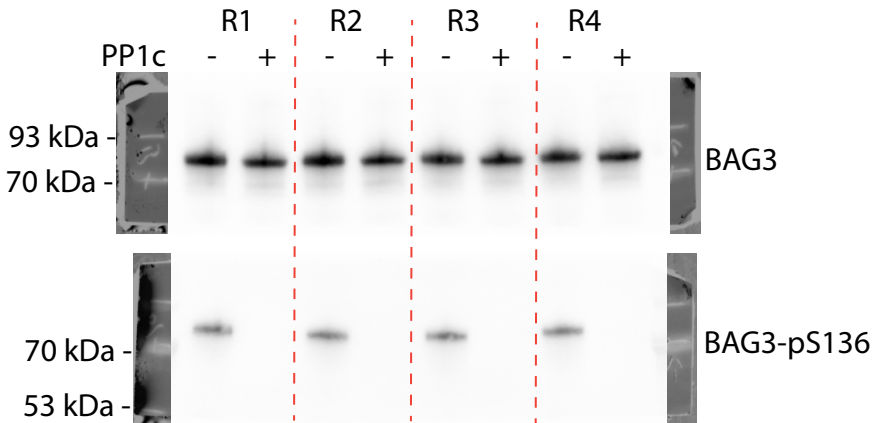

# Figure 2 E

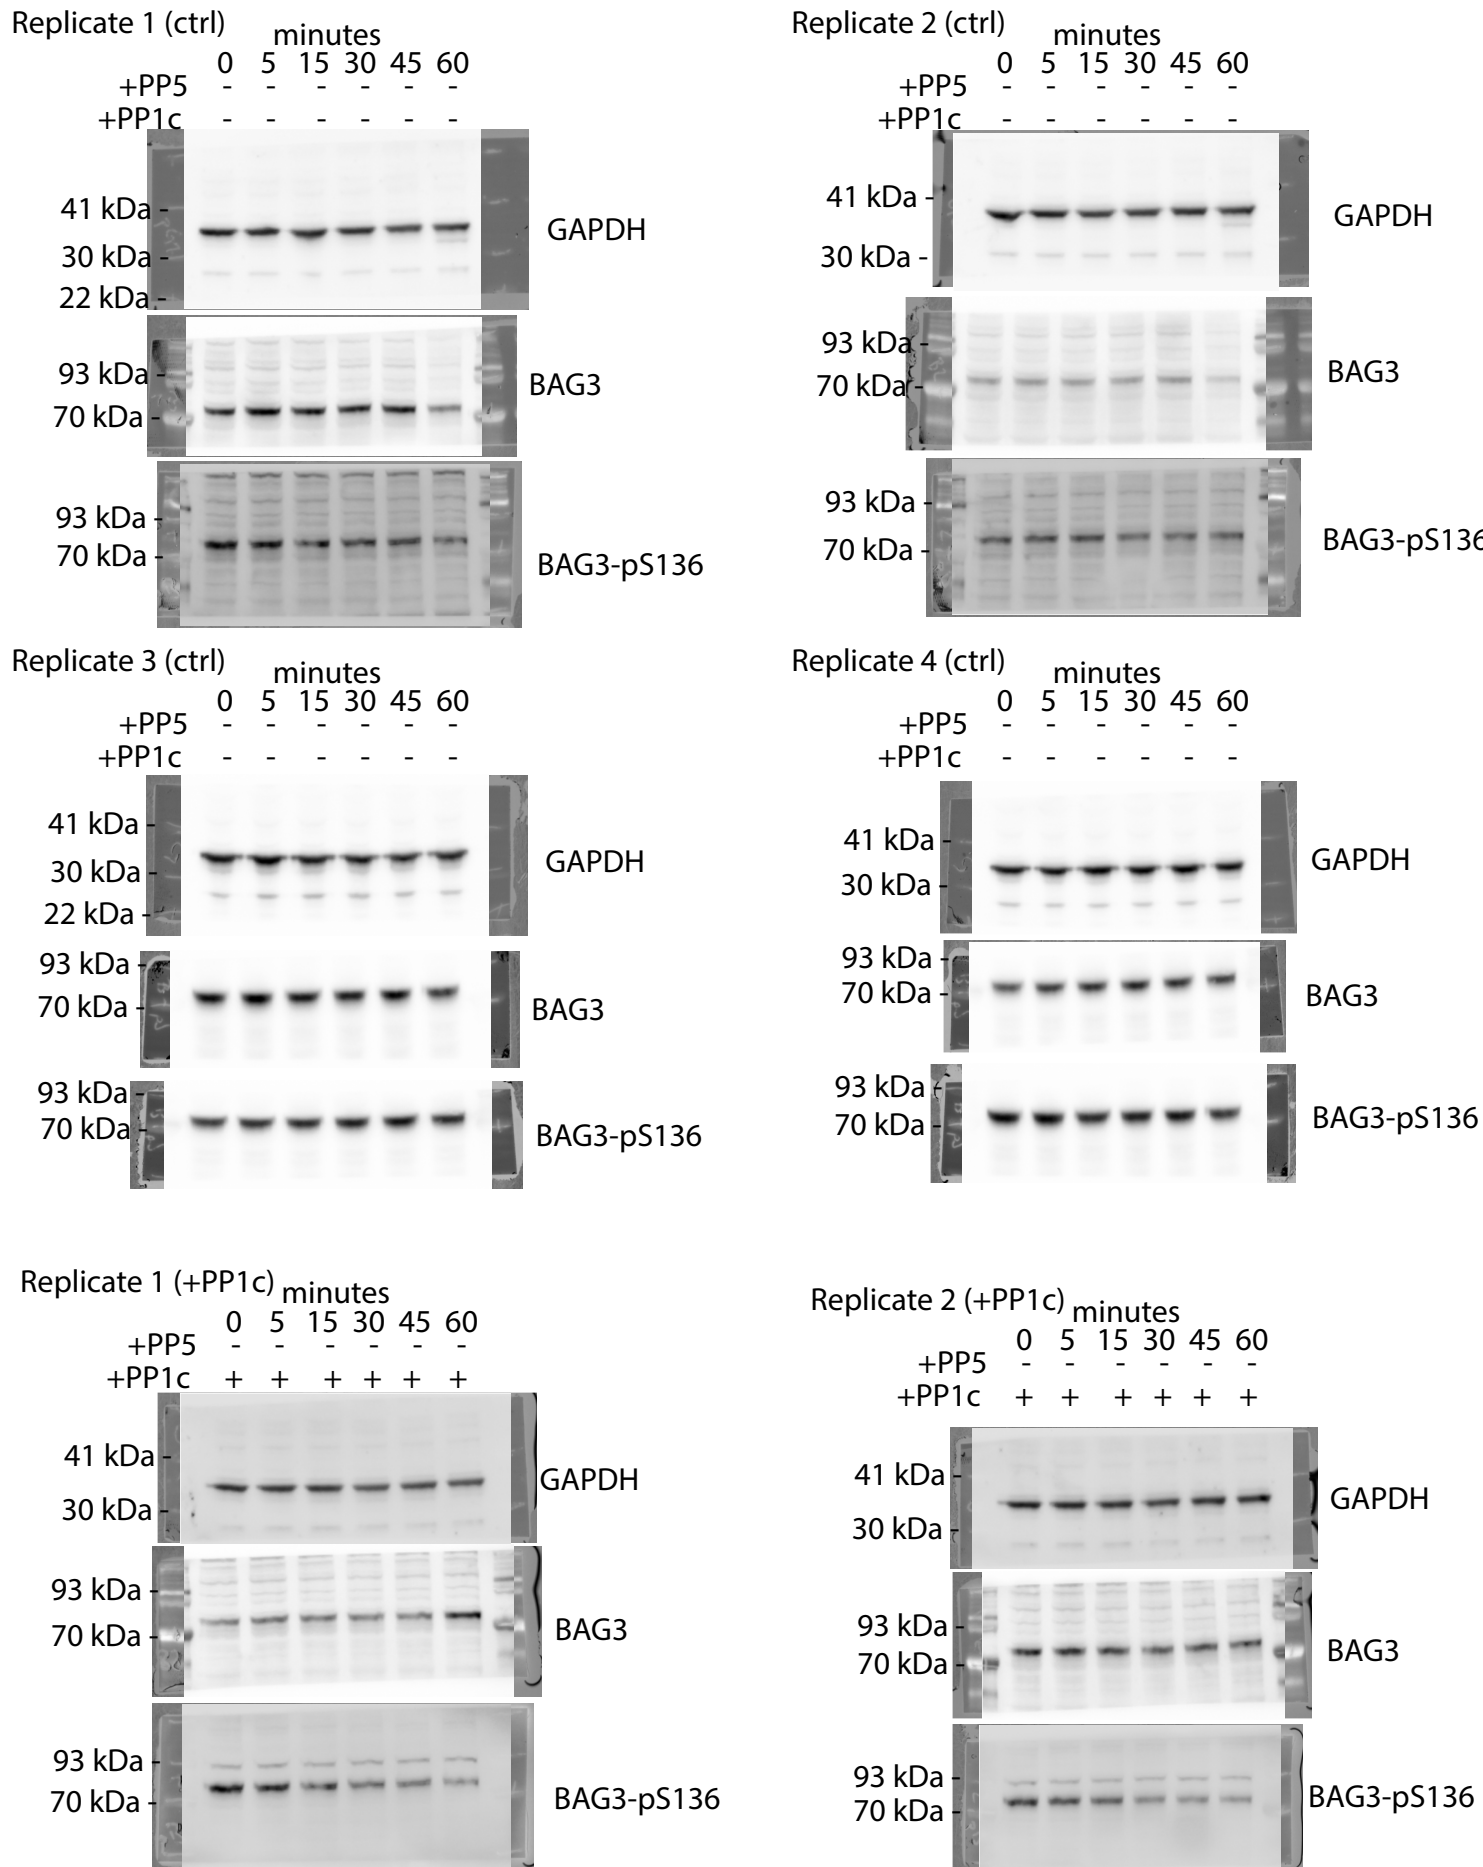

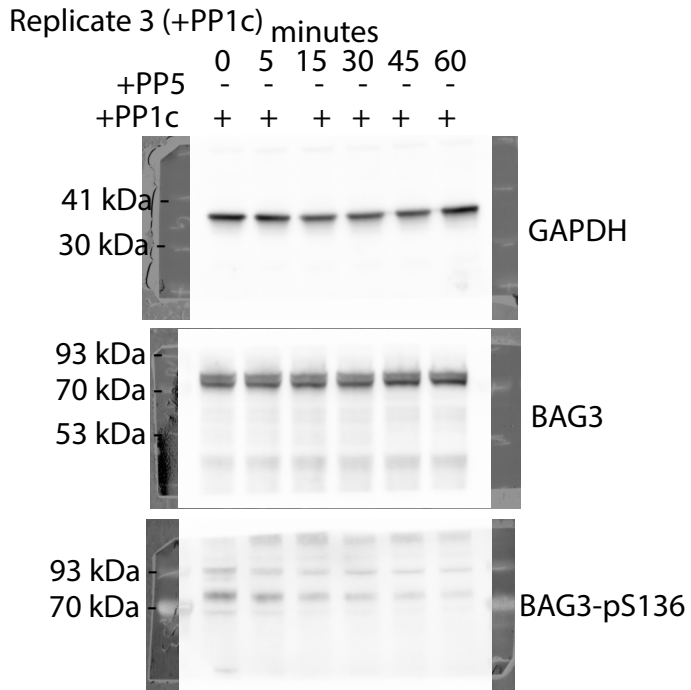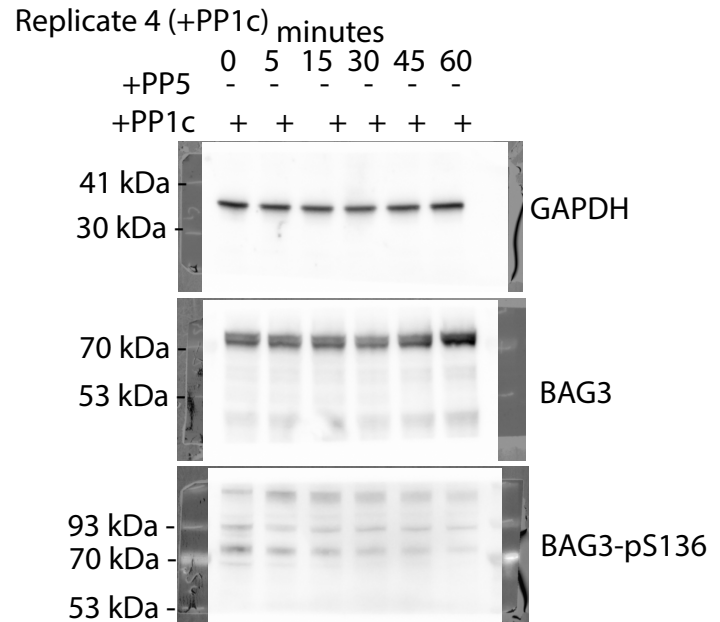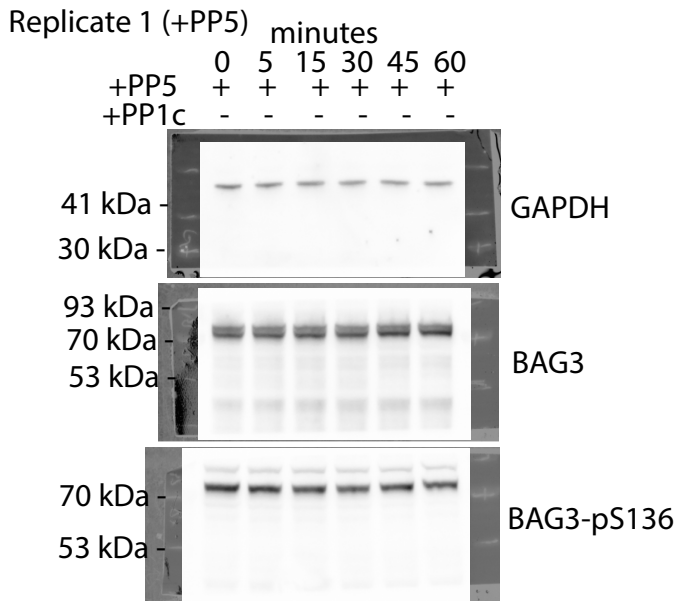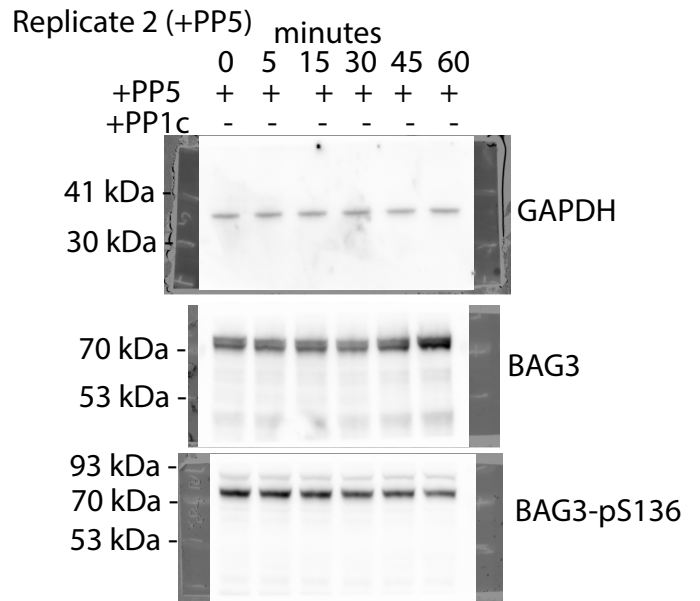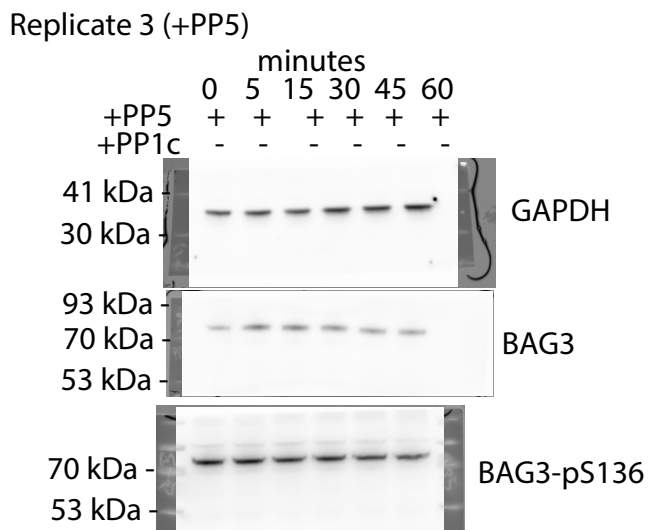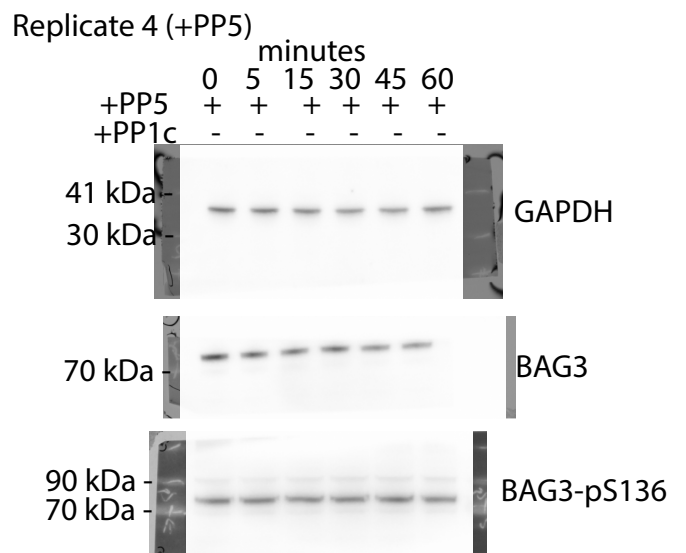

# Supplementary Figure 2 A

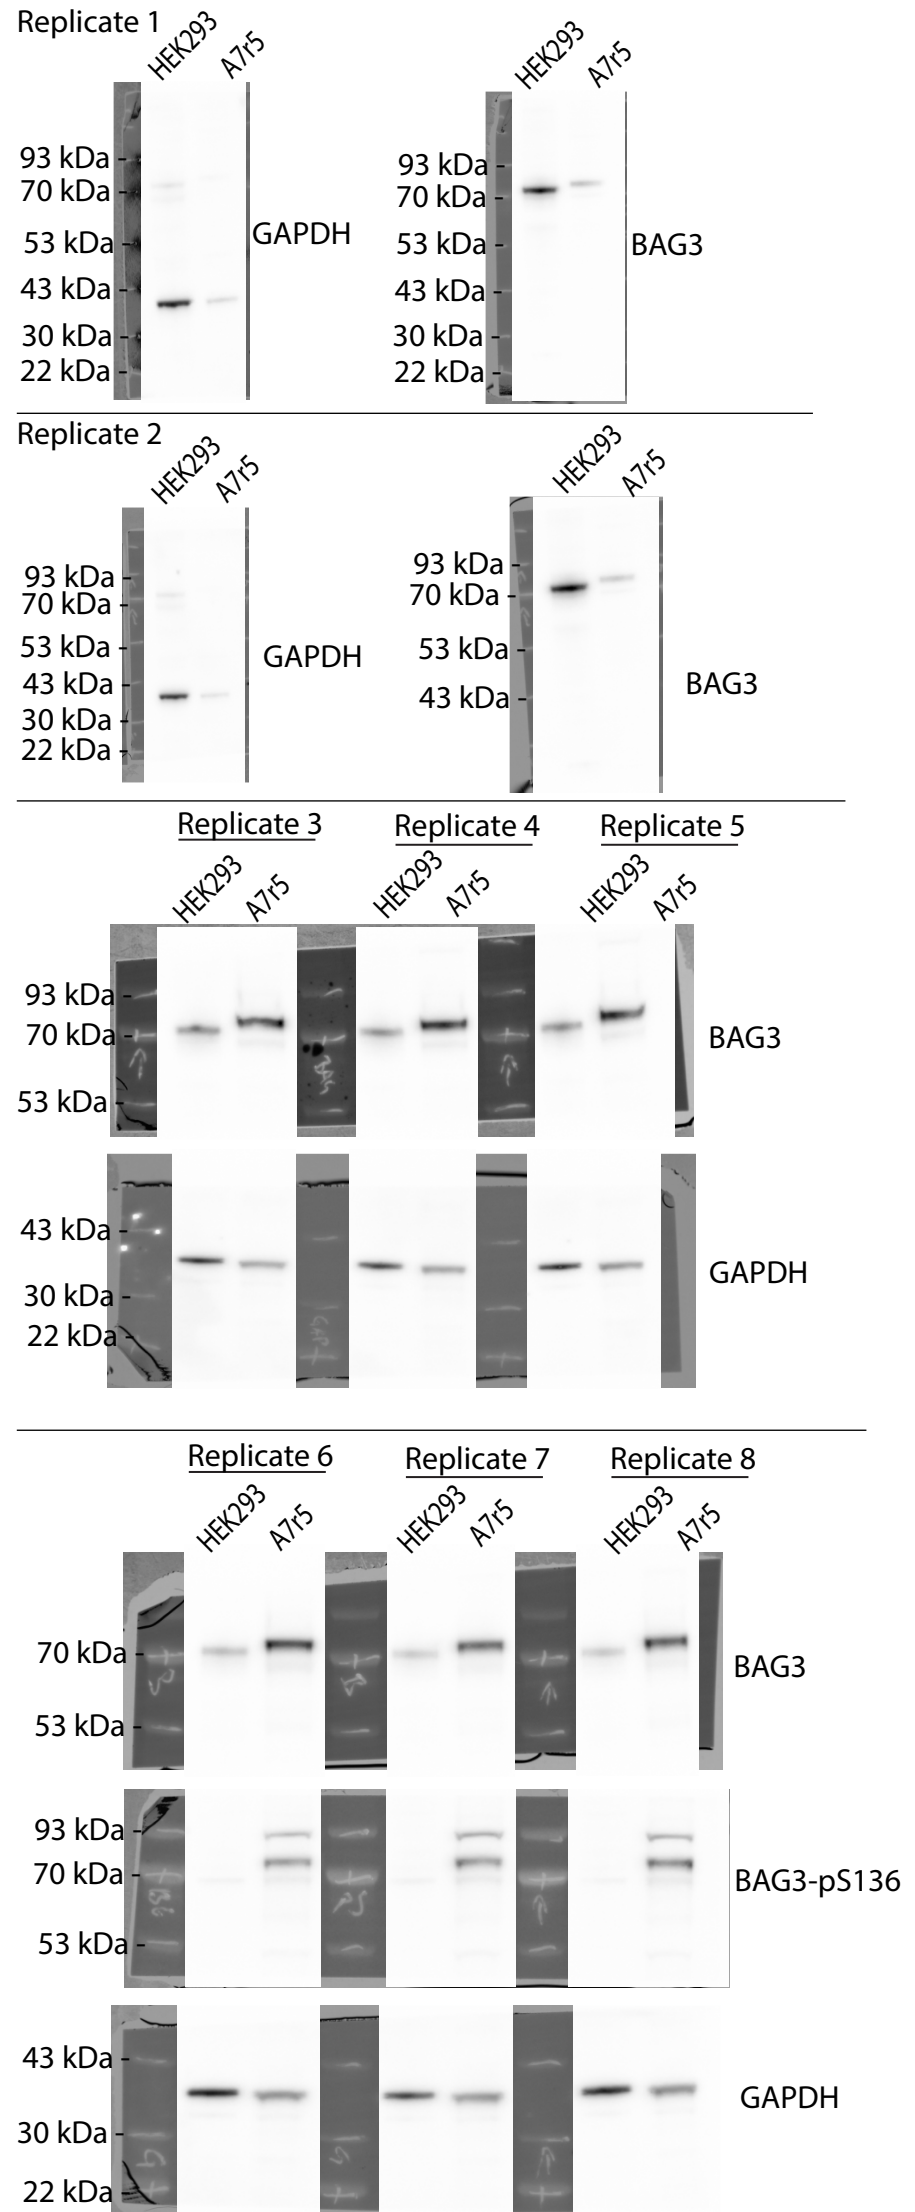

# Supplementary Figure 2 D

Replicate 1 (+PP5)

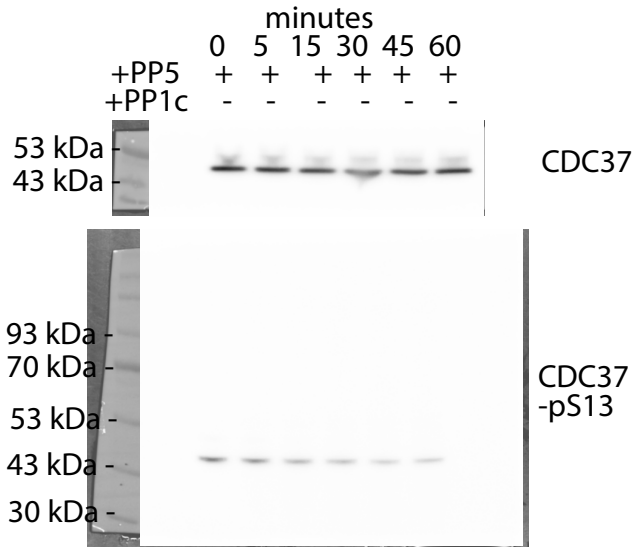

Replicate 2 (+PP5)

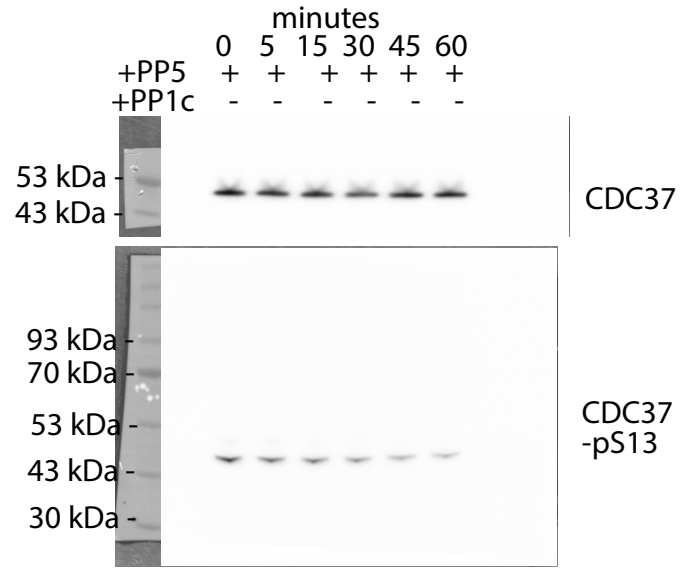

Replicate 3 (+PP5)

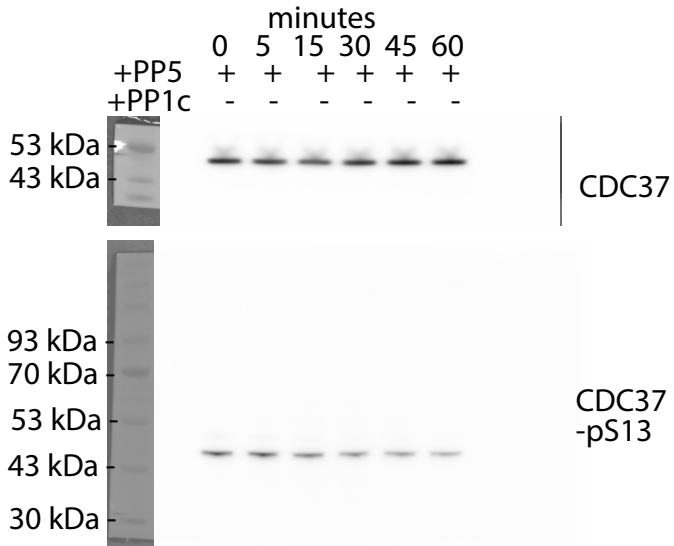

Replicate 4 (+PP5)

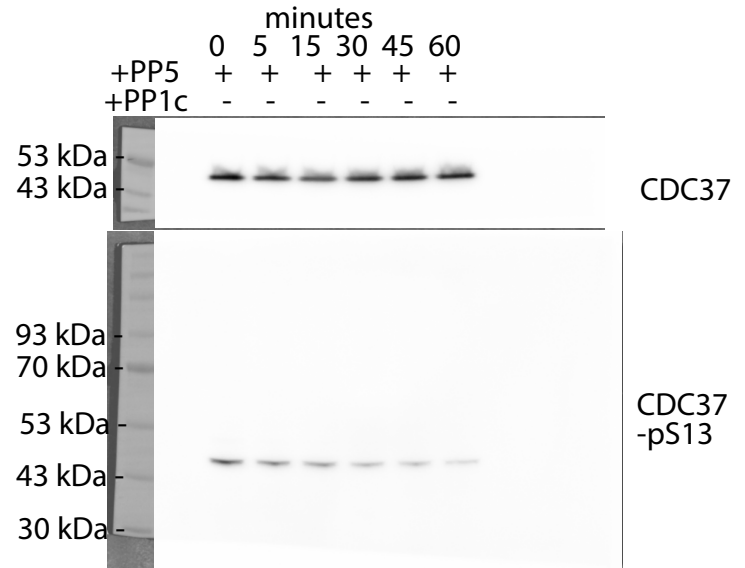

Replicate 5 (+PP5)

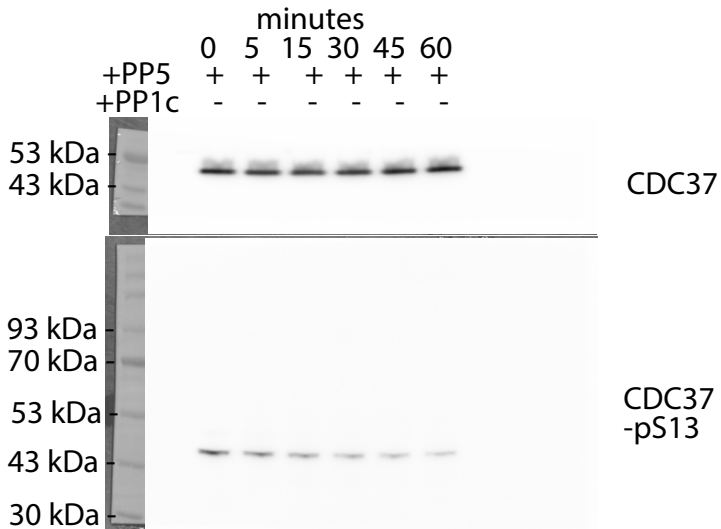

Supplement: LSA-2024-02734_SdataF2.1_FS2.pdf [file LSA-2024-02734_SdataF2.1_FS2.pdf]
