# Supplementary material for: Identification of phosphatases that dephosphorylate the co-chaperone BAG3
Source: PubMed Central journal article supplement (PMC11576475; doi:10.26508/lsa.202402734), 2024-11-19

# Figure 5 A

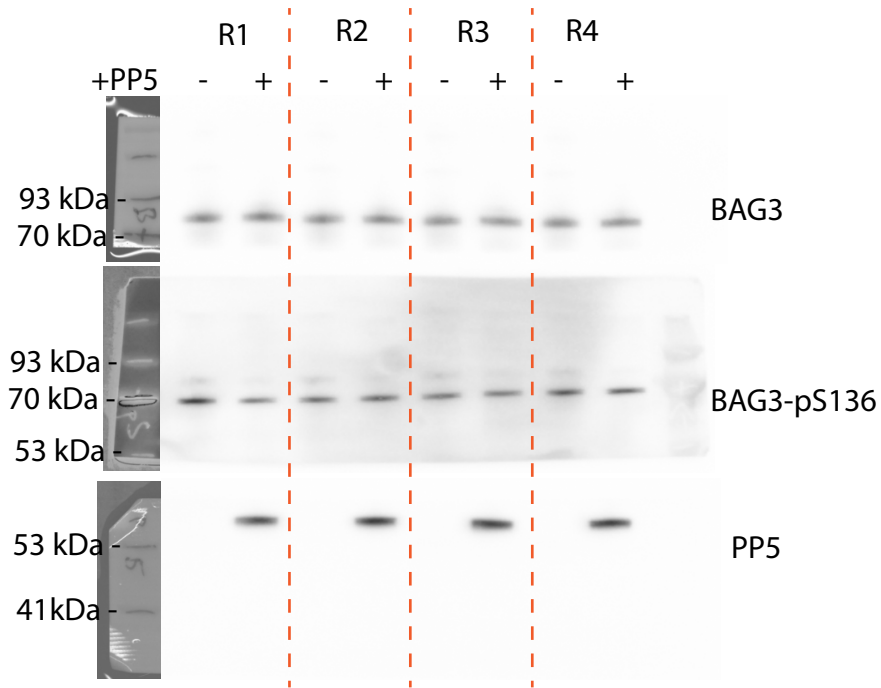

# Figure 5C

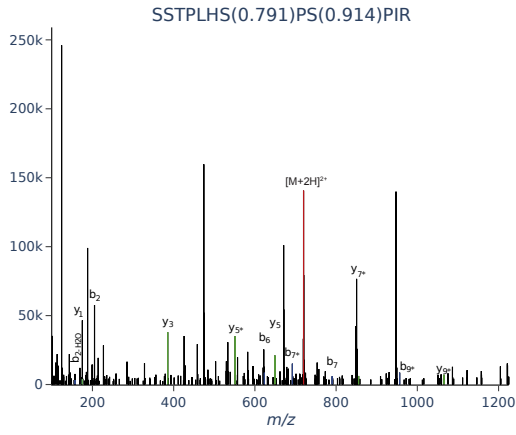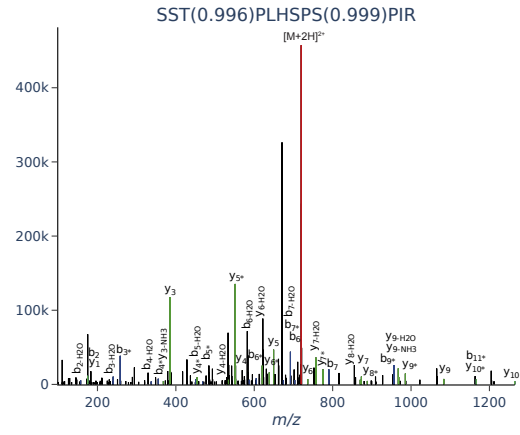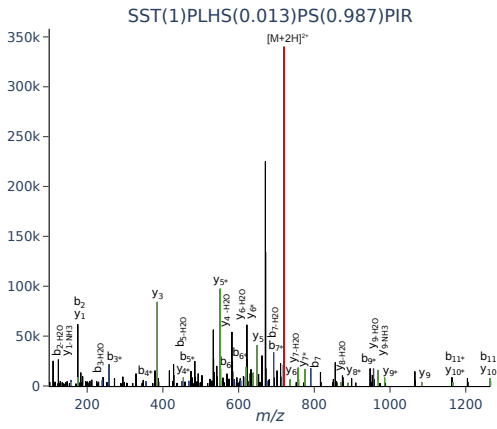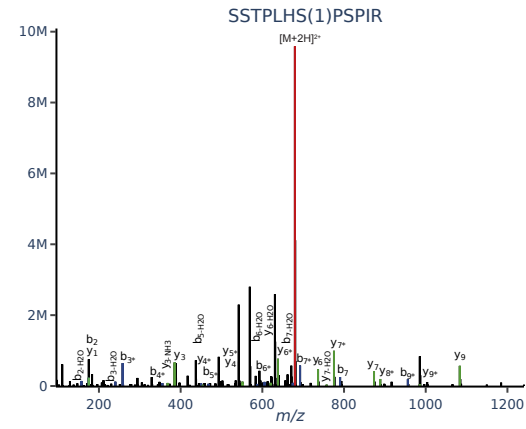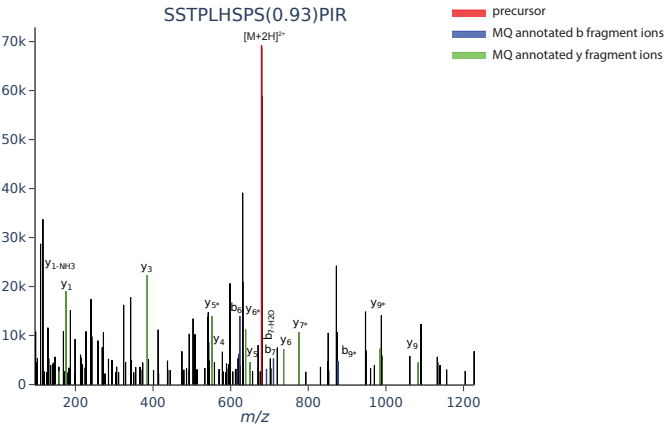

# Figure 5E/ Supplementary Figure 5 D

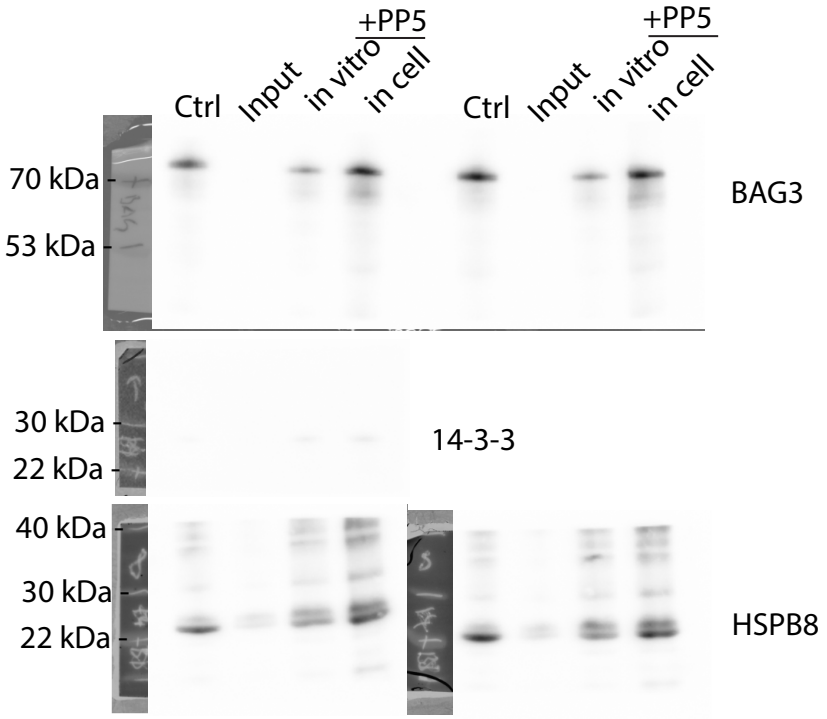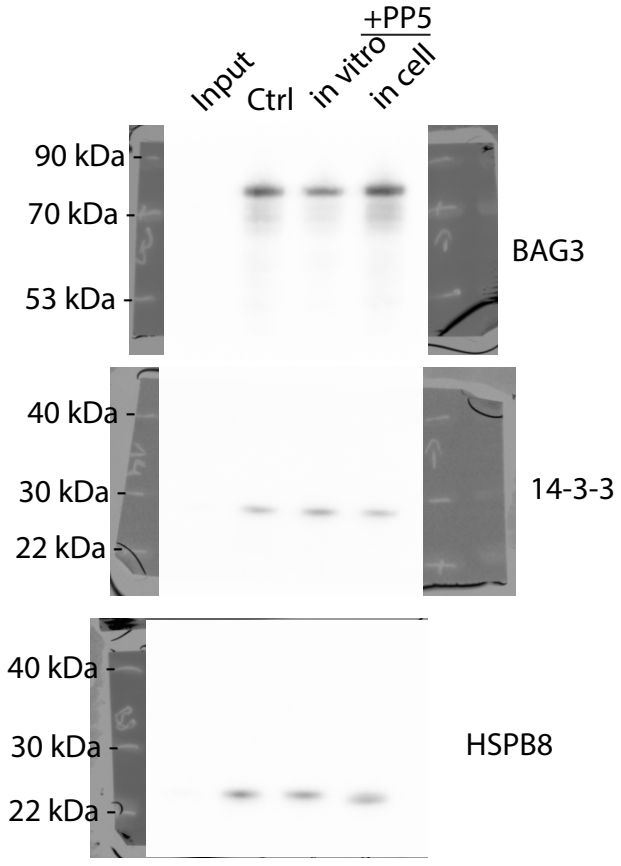

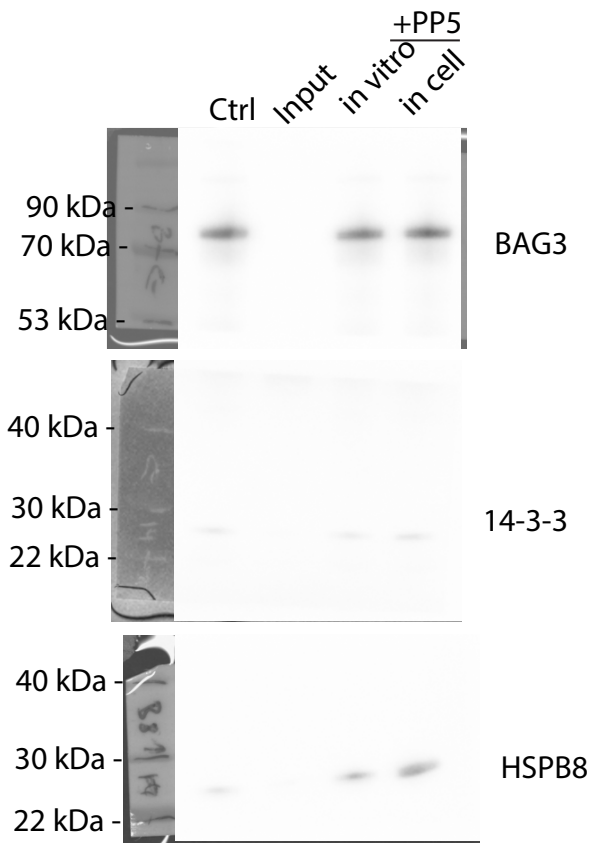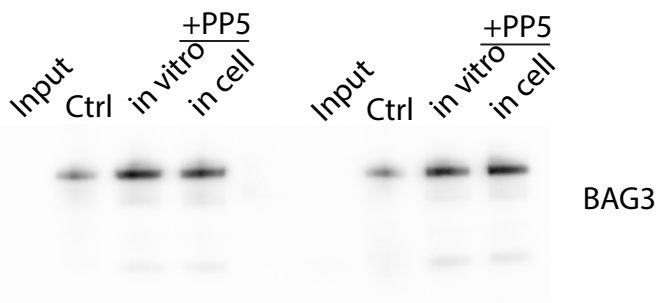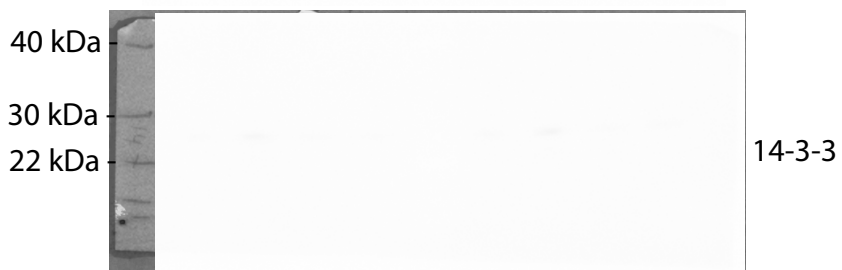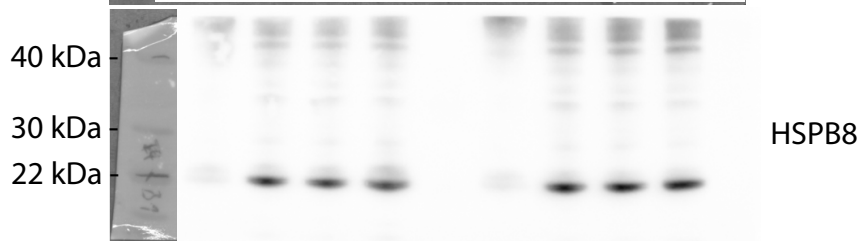

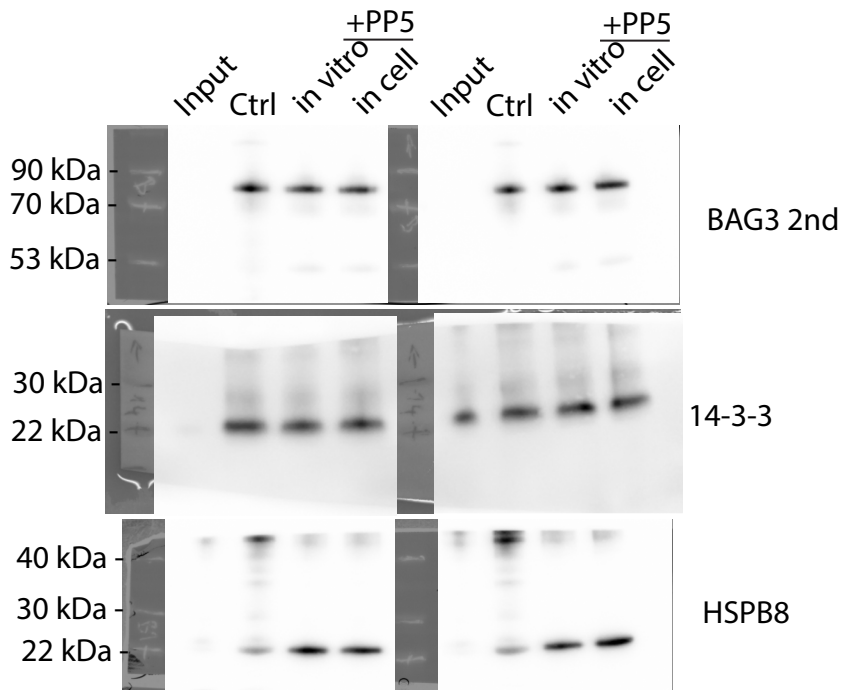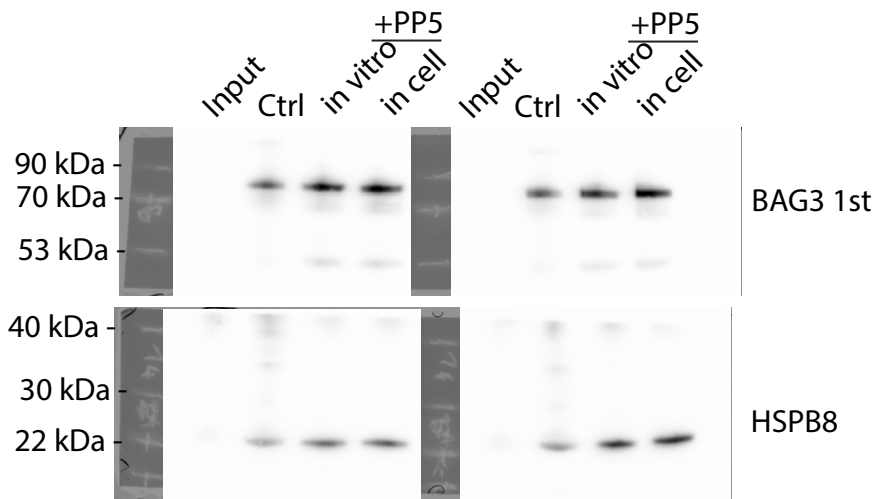

**Figure 5F**

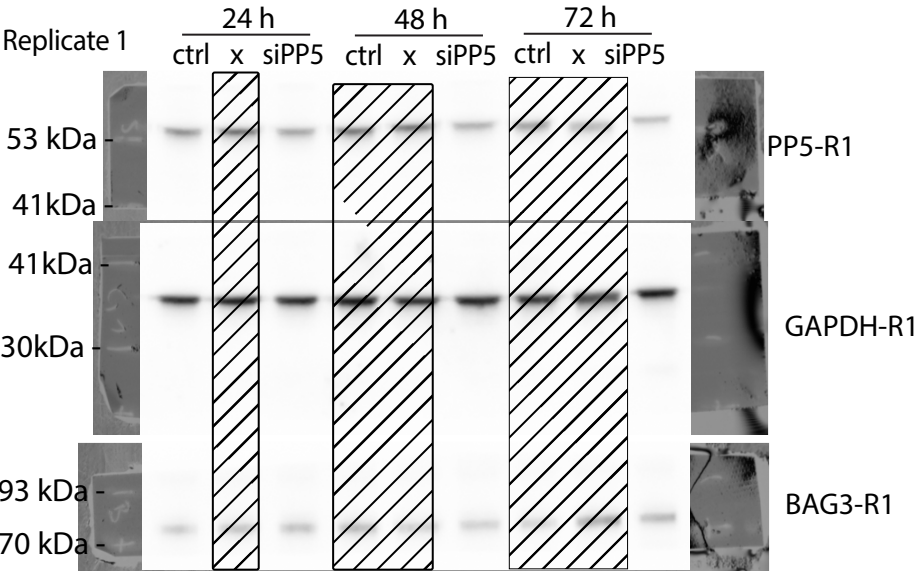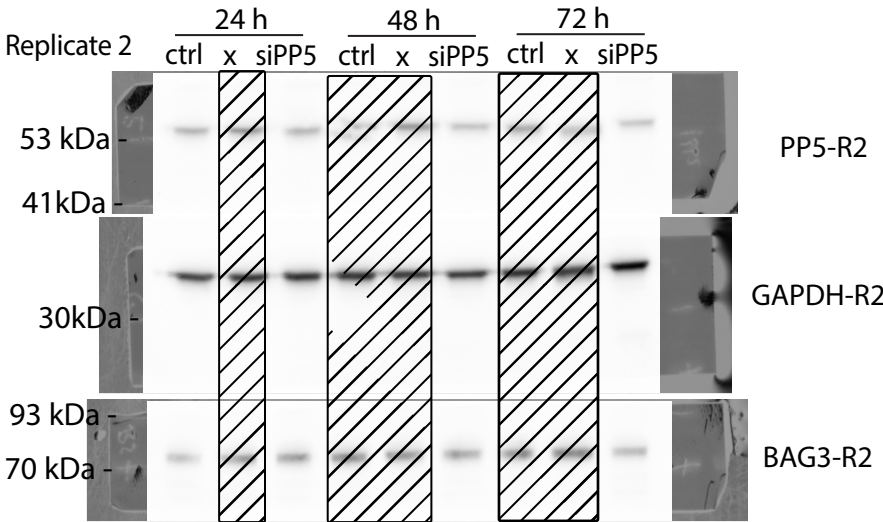

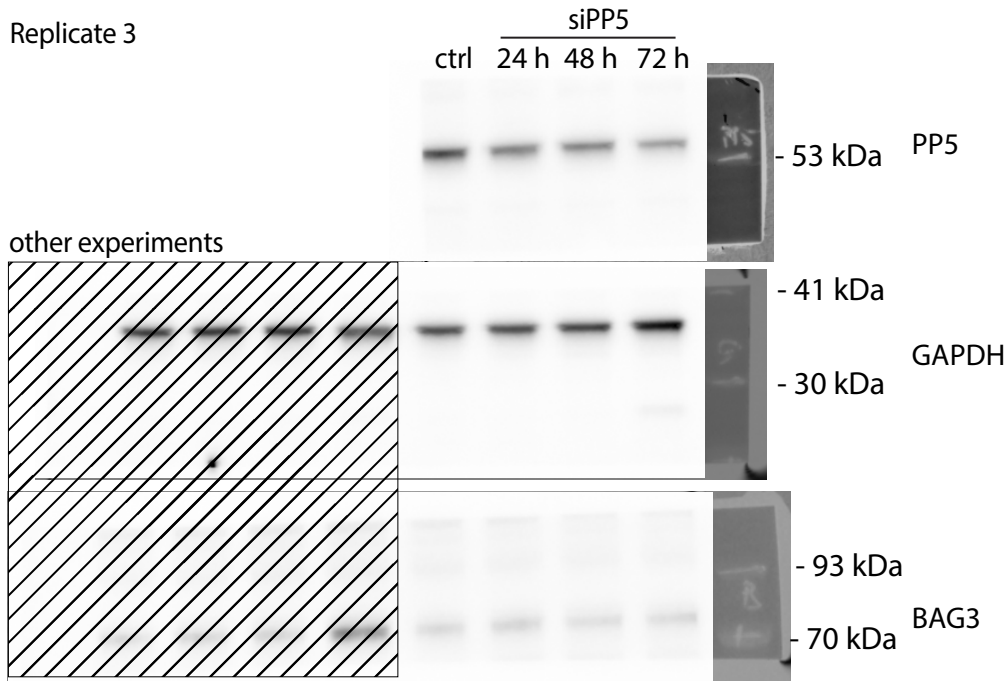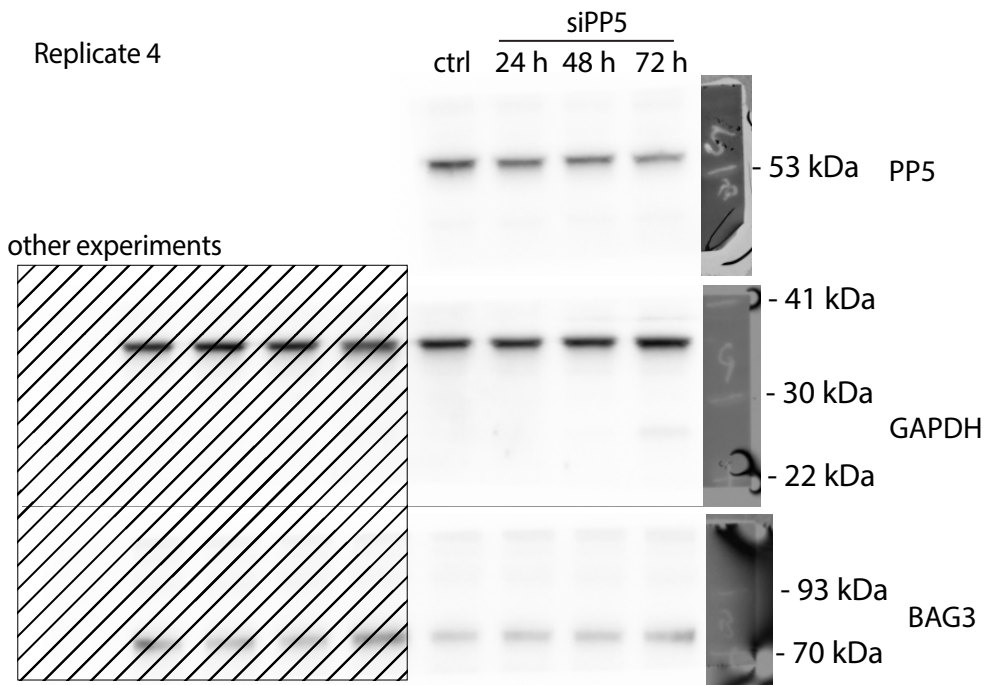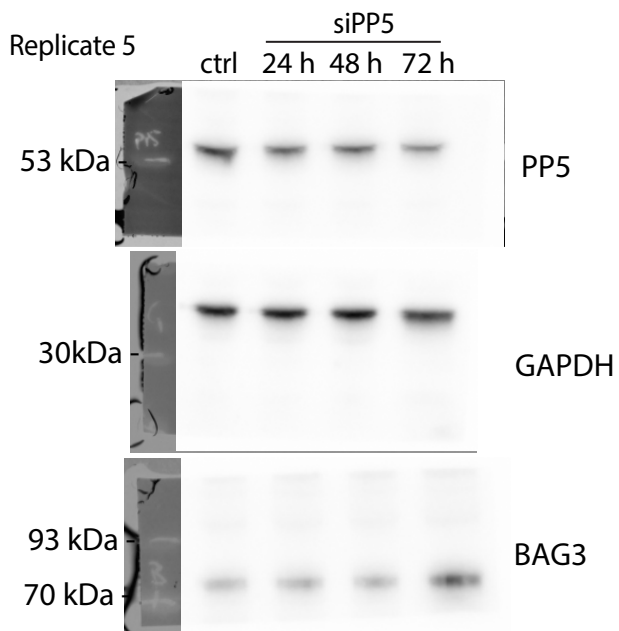

# Figure 5G/ Supplementary Figure 5F

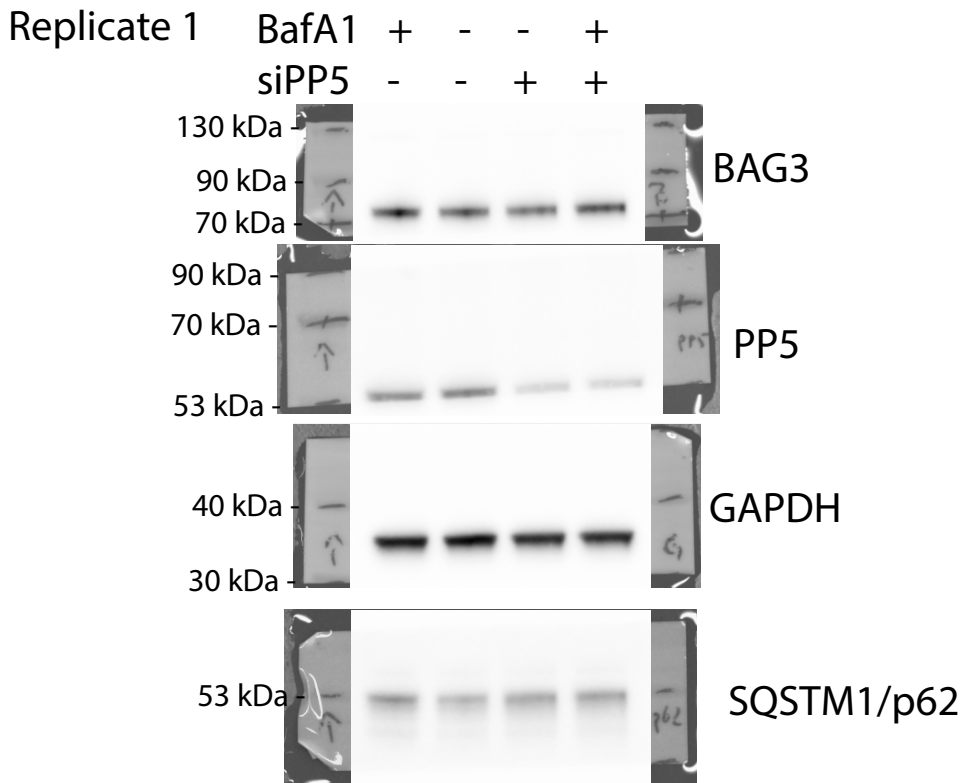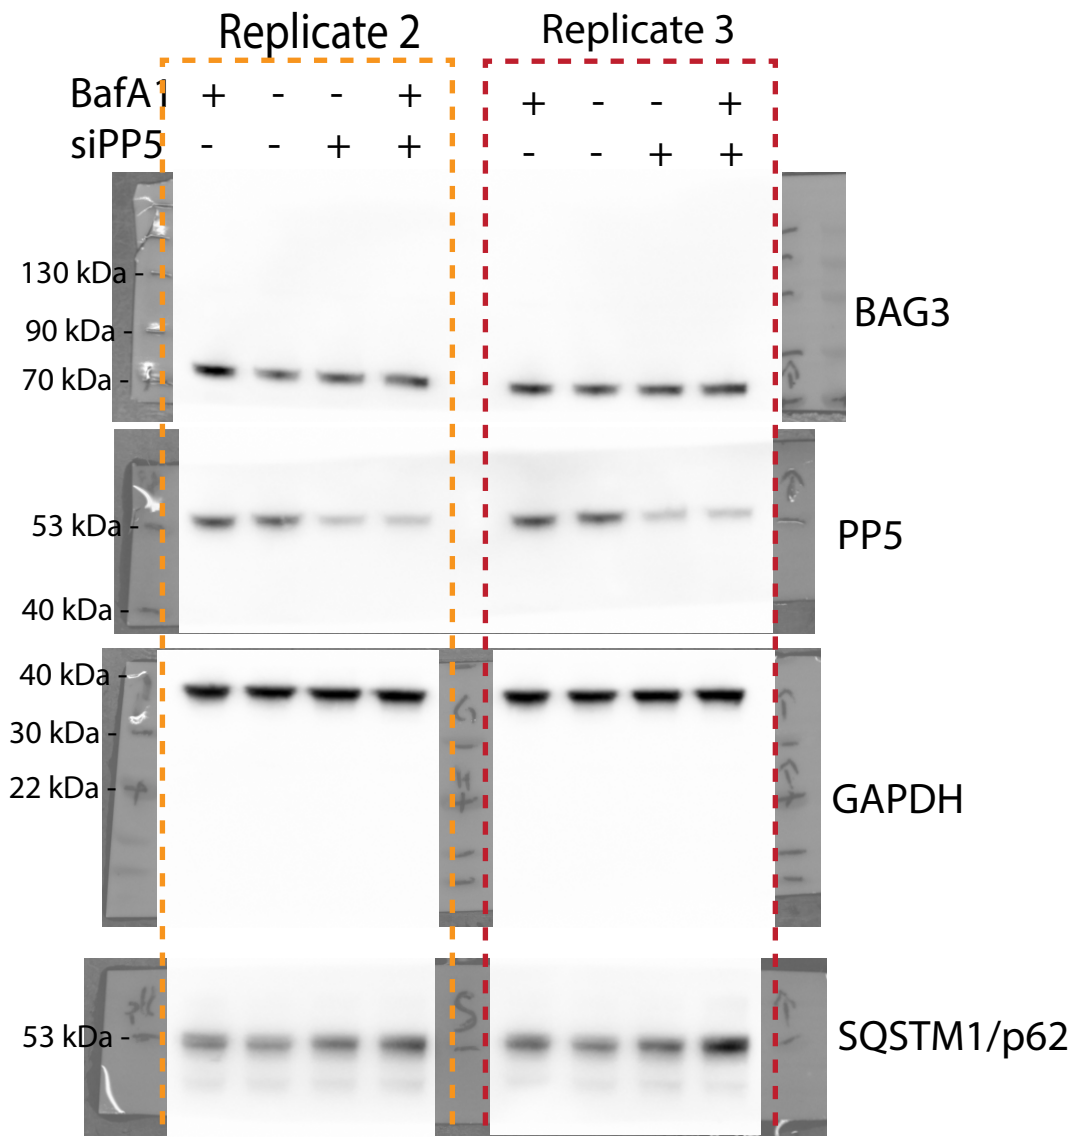



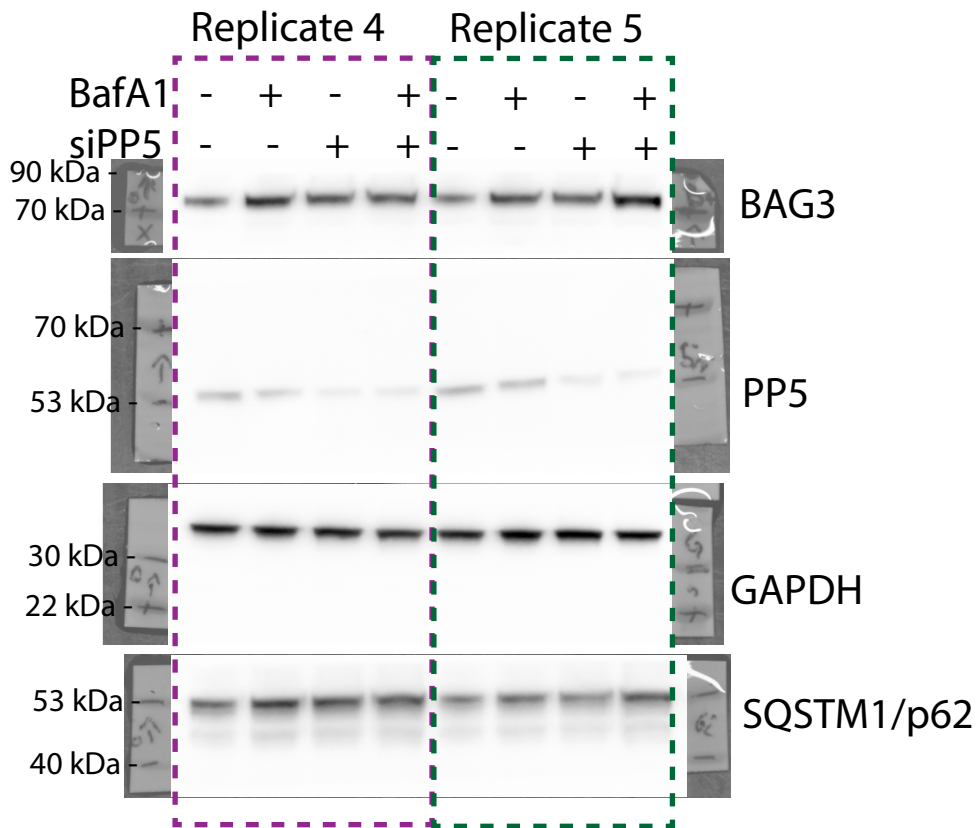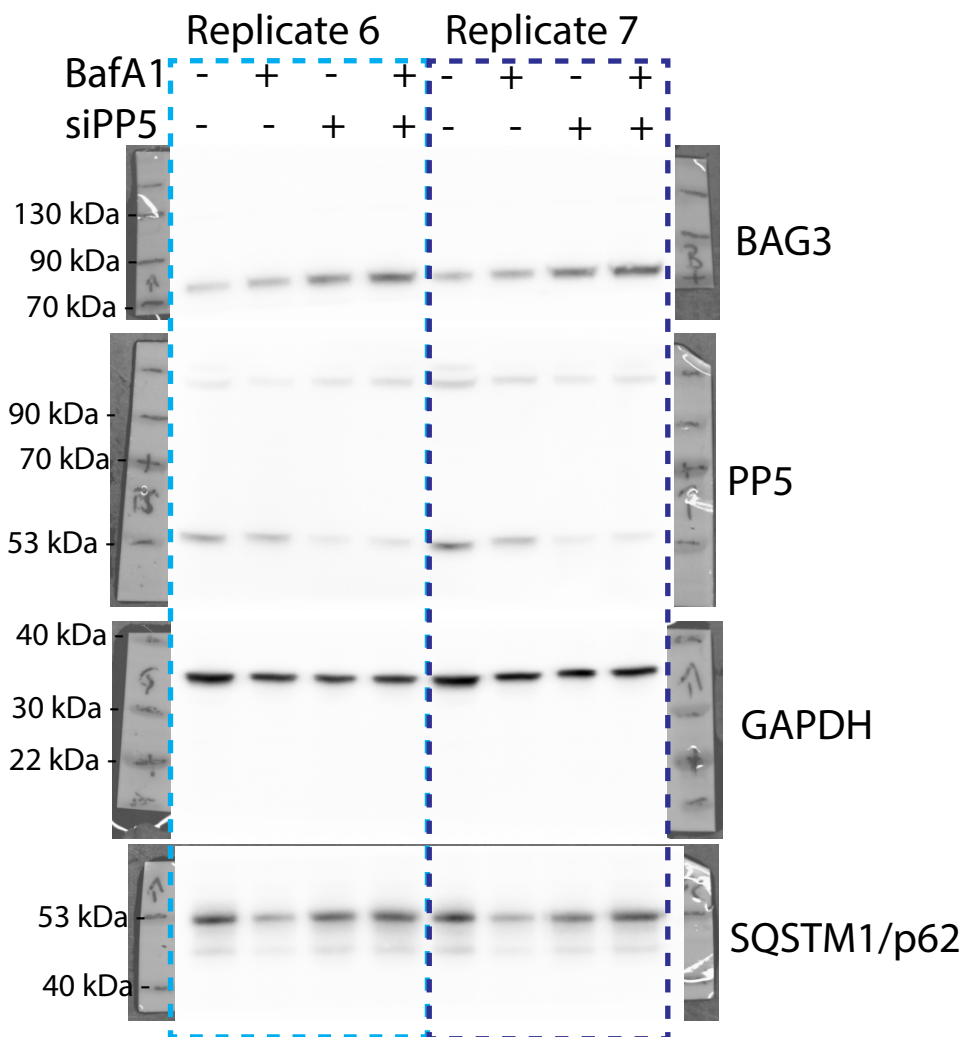

# Supplementary Figure 5C

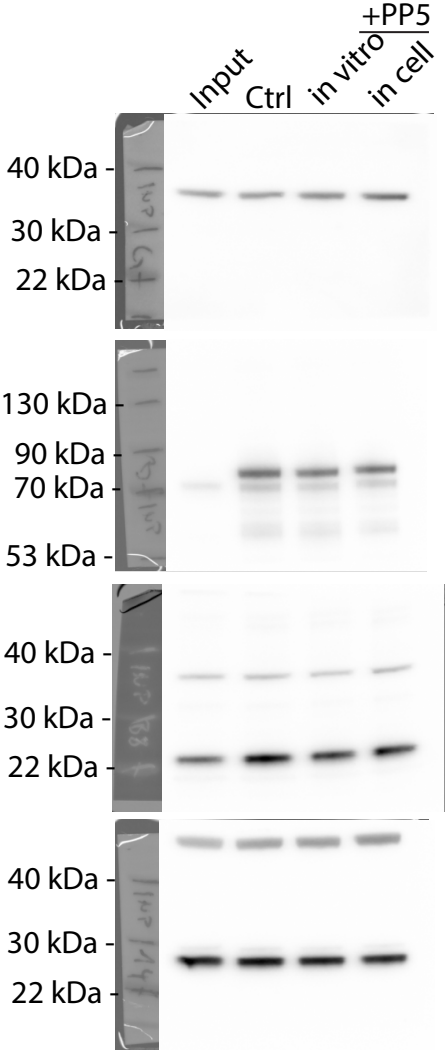

Supplement: LSA-2024-02734_SdataF5.4_FS5.2.pdf [file LSA-2024-02734_SdataF5.4_FS5.2.pdf]
