# Supplementary material for: Identification of phosphatases that dephosphorylate the co-chaperone BAG3
Source: PubMed Central journal article supplement (PMC11576475; doi:10.26508/lsa.202402734), 2024-11-19

### Figure 3 A

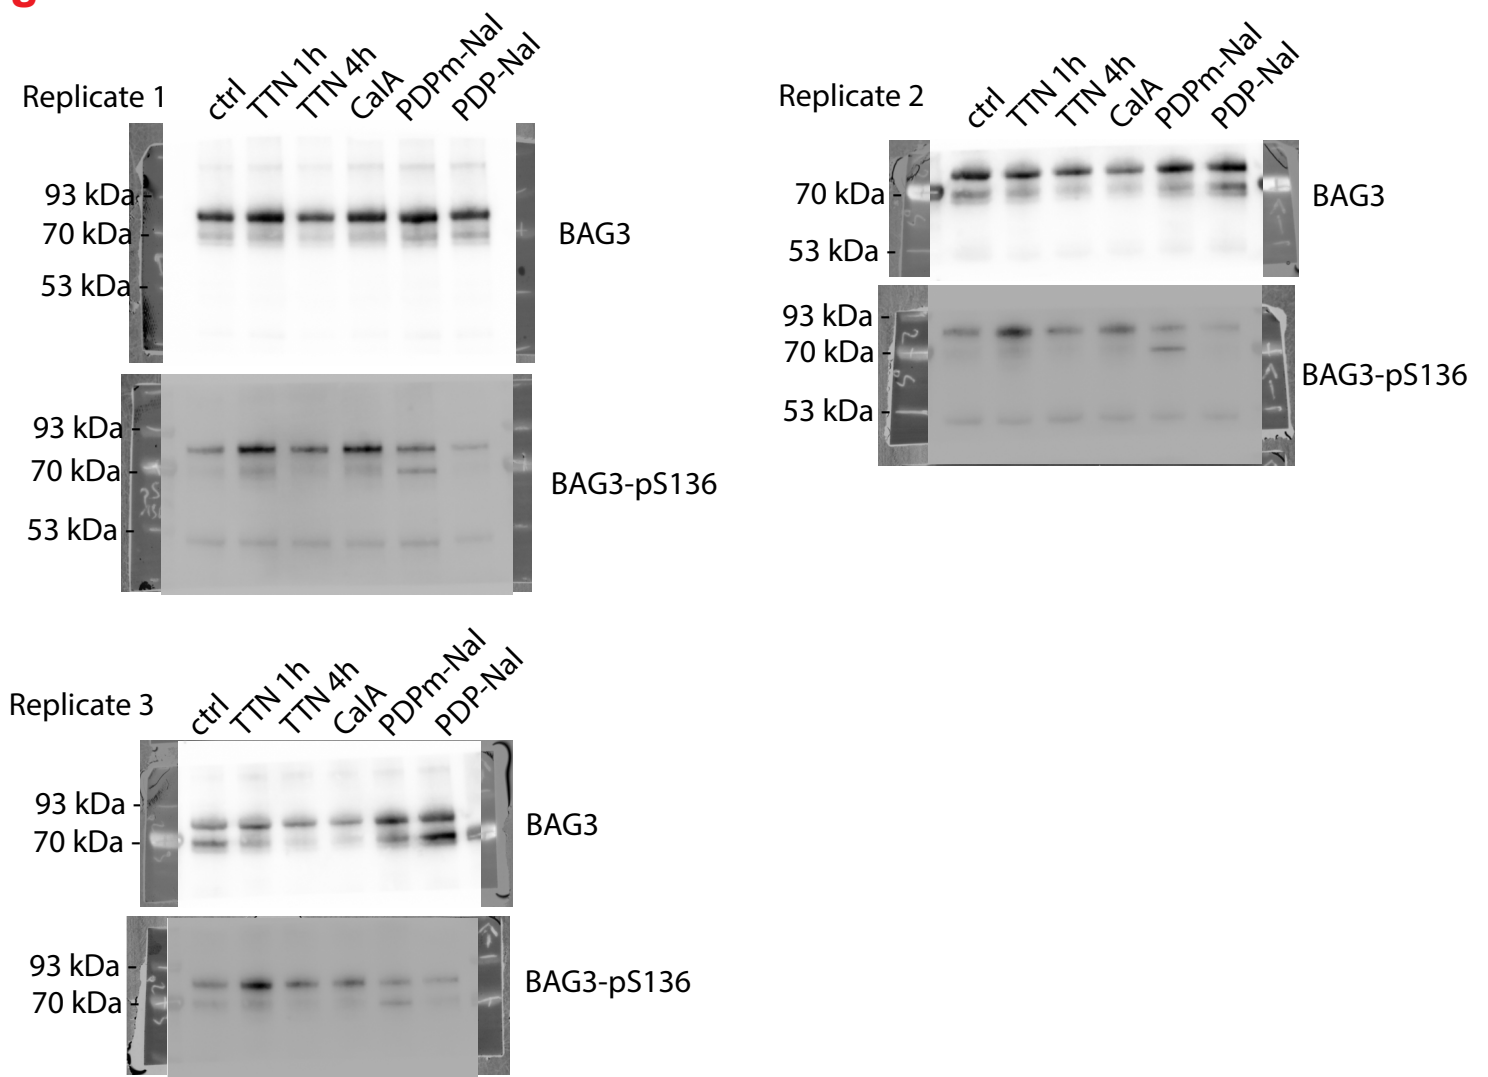

### Figure 3 B

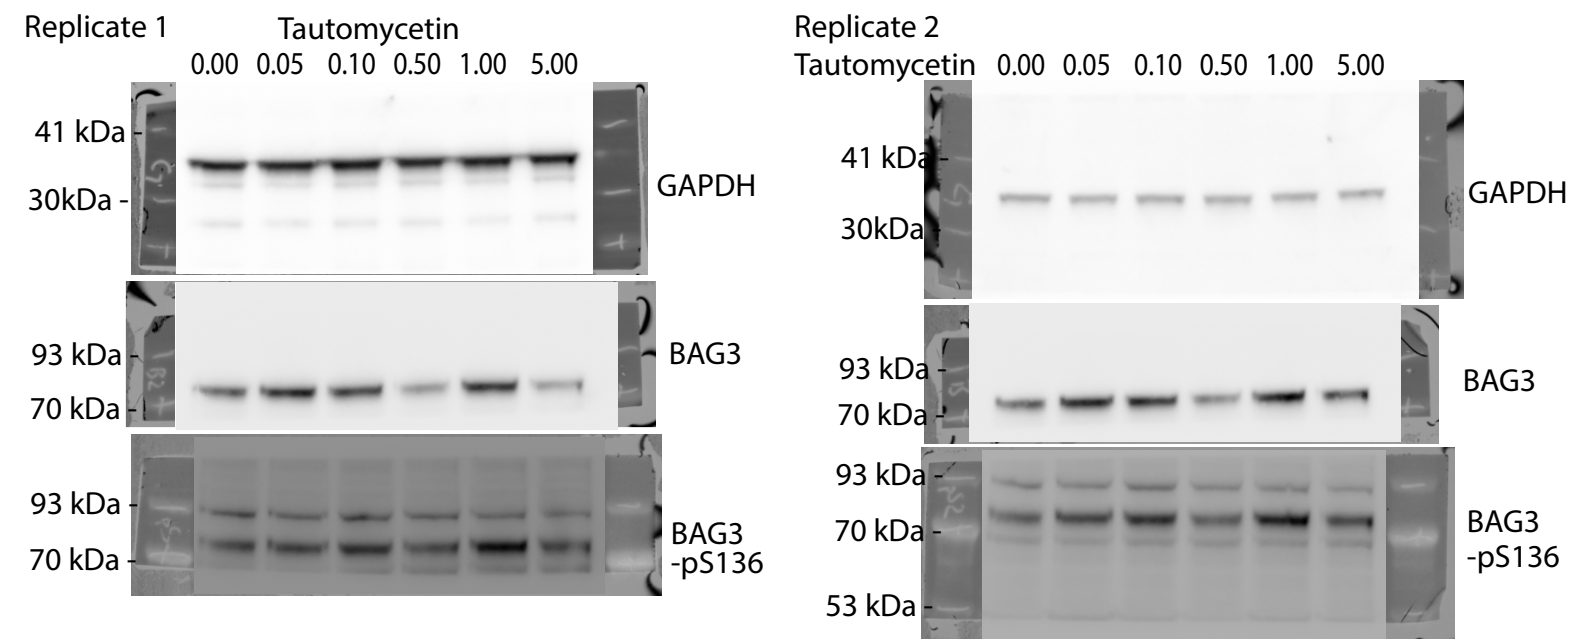

Replicate 3

Tautomycetin 0.00 0.05 0.10 0.50 1.00 5.00

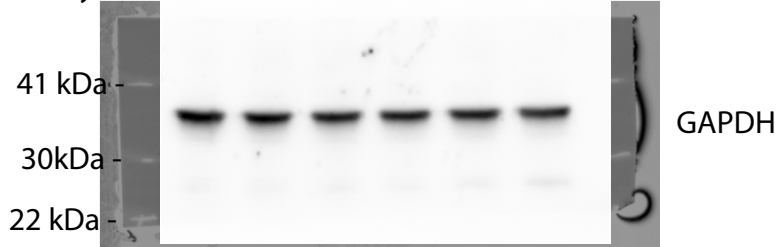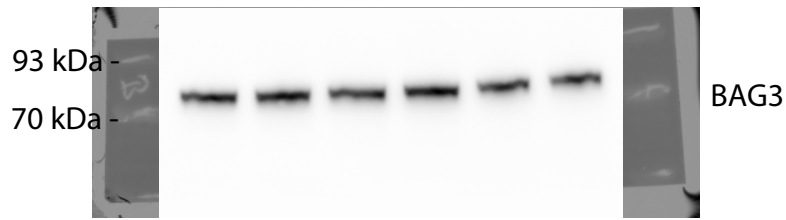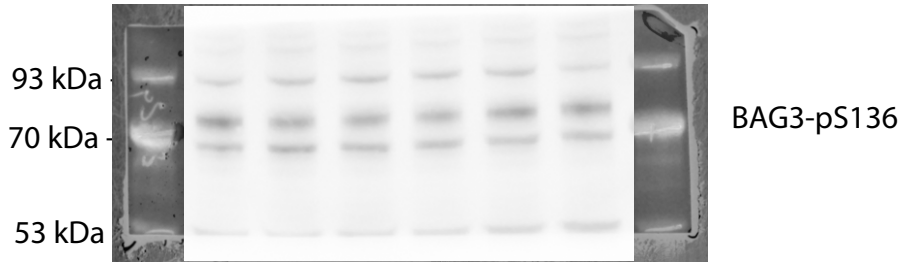

Replicate 4

Tautomycetin 0.00 0.05 0.10 0.50 1.00 5.00

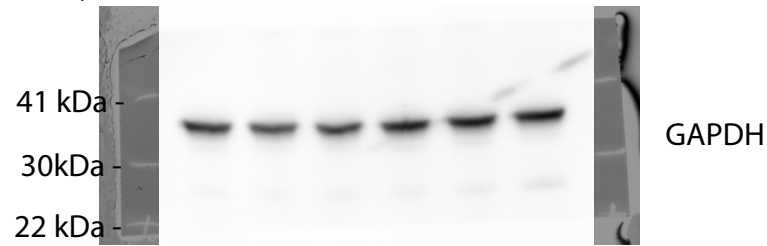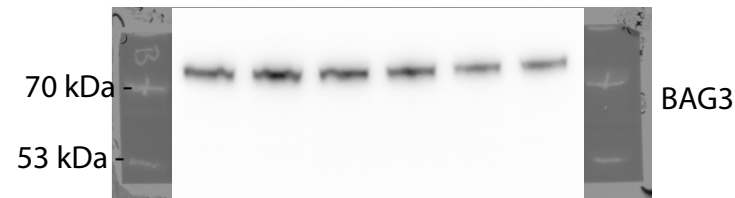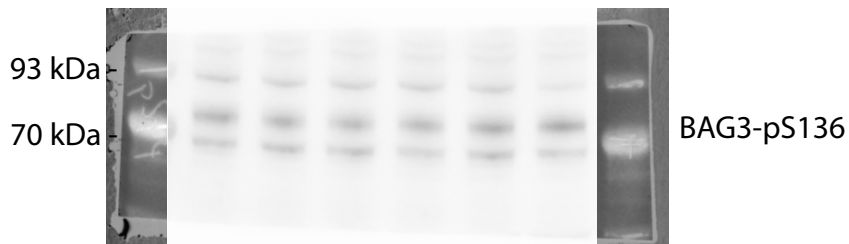

**Figure 3 C**

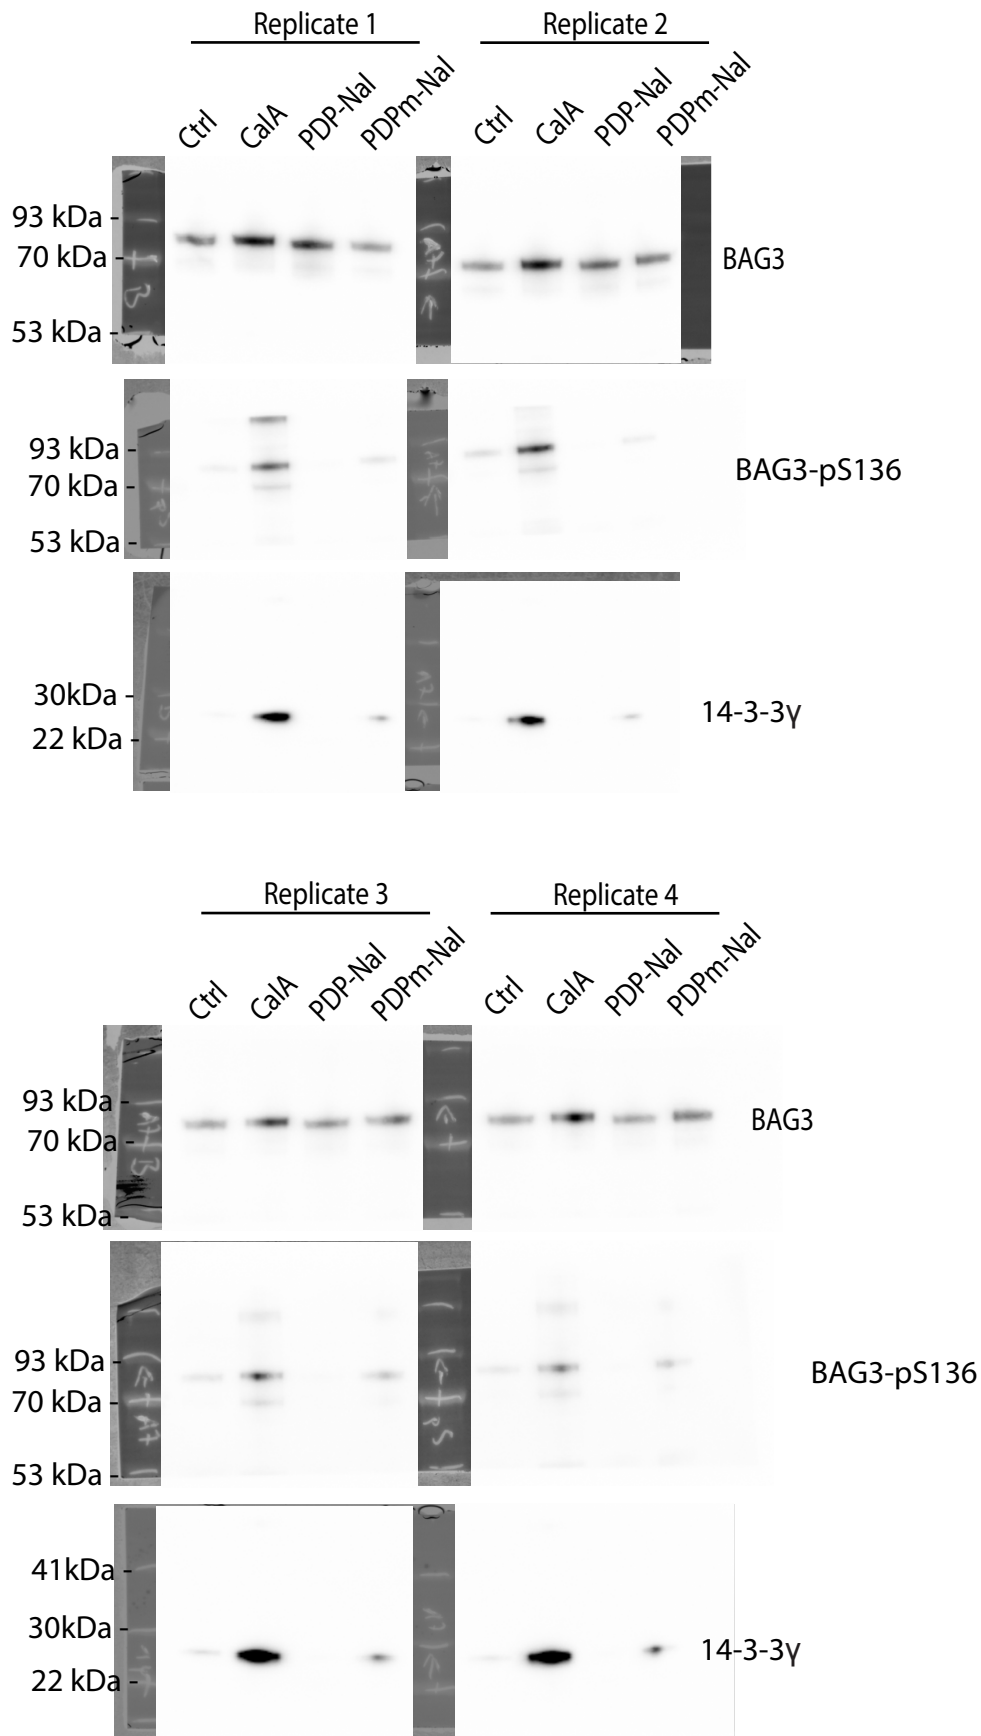

# Figure 3 D - PP1C/A/B/C

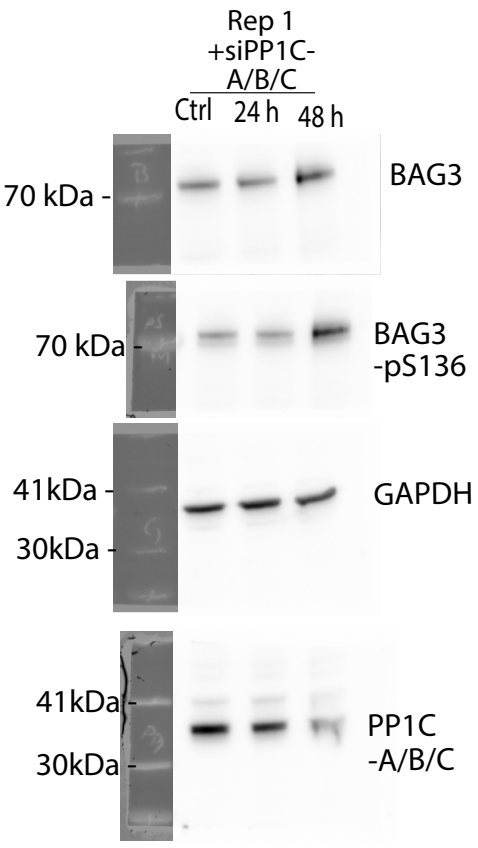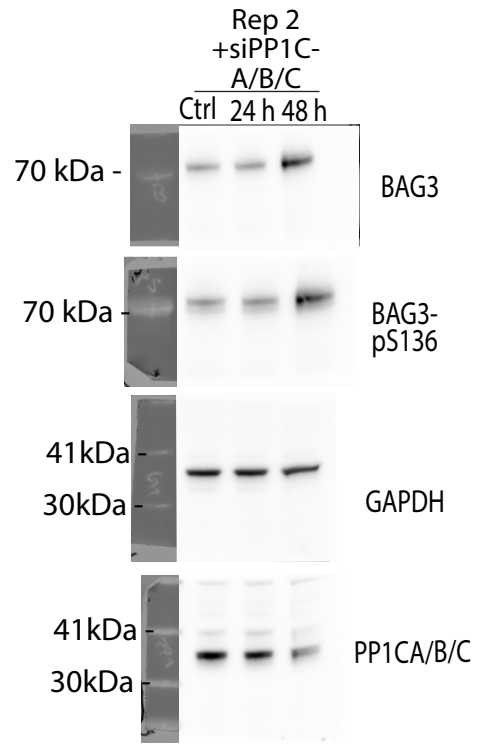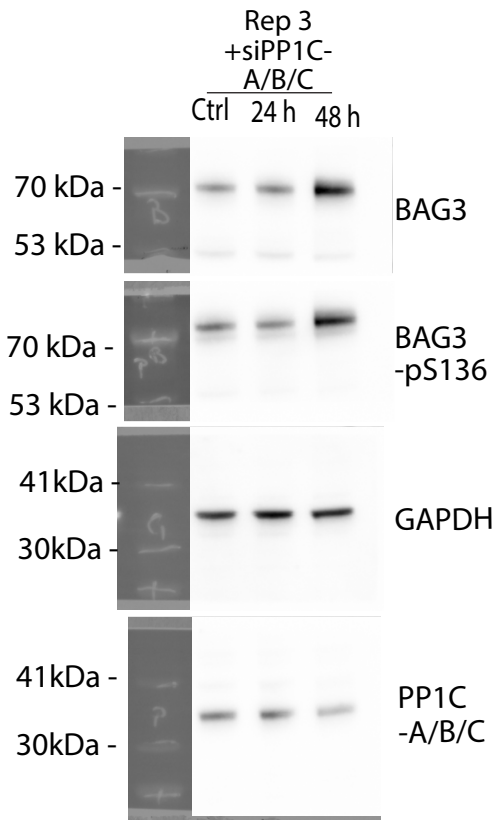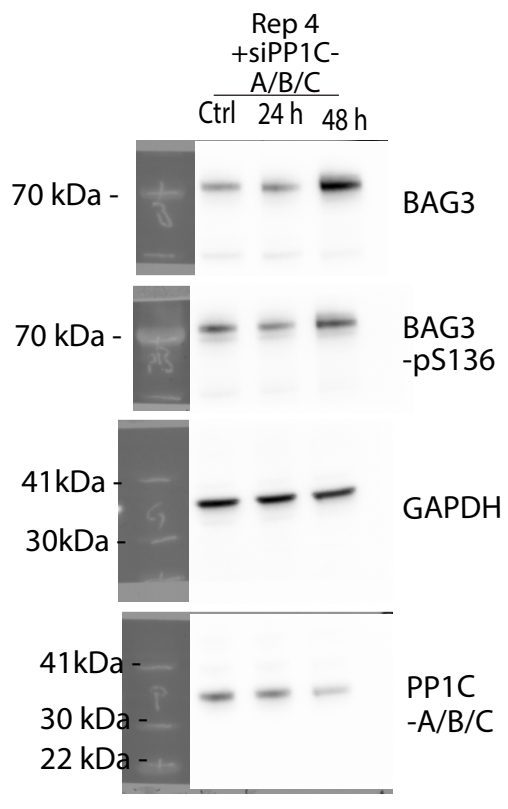



# Figure 3 D - PP1CC

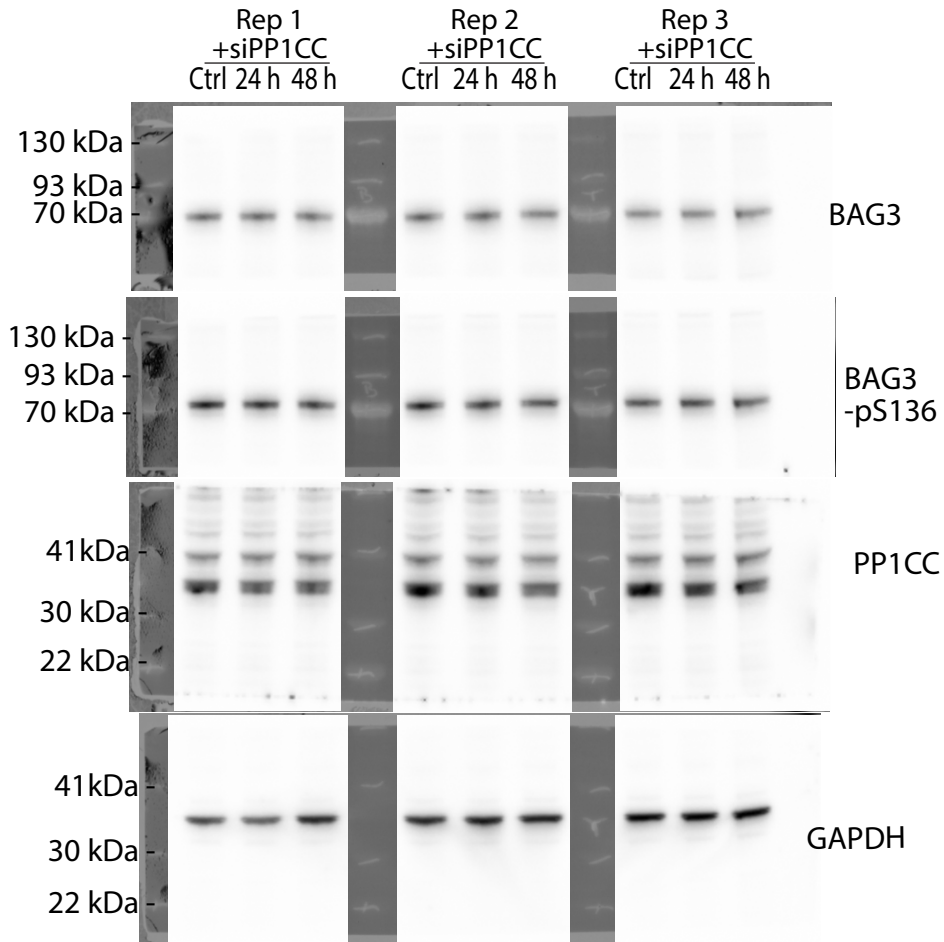

Supplement: LSA-2024-02734_SdataF3_FS3.pdf [file LSA-2024-02734_SdataF3_FS3.pdf]
